# Supplementary material for: Optimizing dissolved gas composition in a double-bath-type sonoreactor for efficient production of ultrasonic-activated water with stable oxygen and nitrogen reactive species
Source: Royal Society of Chemistry journal article supplement (doi:10.1039/d3re00206c), 2023-01-01
Supplement: d3re00206c1.pdf [file d3re00206c1.pdf]

## 1 Supplemental

### 2 Insights into the influences of dissolved gases on the production of ultrasonic- 3 activated water in a novel double-bath-type sonoreactor

4 Bao-Ngoc T. Le<sup>1,+</sup>, Nguyen-Phuong Nguyen<sup>1,2</sup>, Thanh-Linh H. Duong<sup>1</sup>, Tri Nguyen<sup>1</sup>, Tien-

5 Cuong Hoang<sup>1</sup>, Hoang-Duy P. Nguyen<sup>1,+</sup>, Thuy-Phuong T. Pham<sup>1,2,\*</sup>

6 <sup>1</sup>*Institute of Chemical Technology, Vietnam Academy of Science and Technology, 1A TL29*

7 *Street, Thanh Loc Ward, District 12, Ho Chi Minh City, Vietnam*

8 <sup>2</sup>*Graduate University of Science and Technology, Vietnam Academy of Science and*

9 *Technology, 18 Hoang Quoc Viet Street, Cau Giay District, Hanoi, Vietnam*

10 \*Corresponding author: pttphuong@ict.vast.vn (Pham Thi Thuy Phuong)

11 + Those authors contributed equally

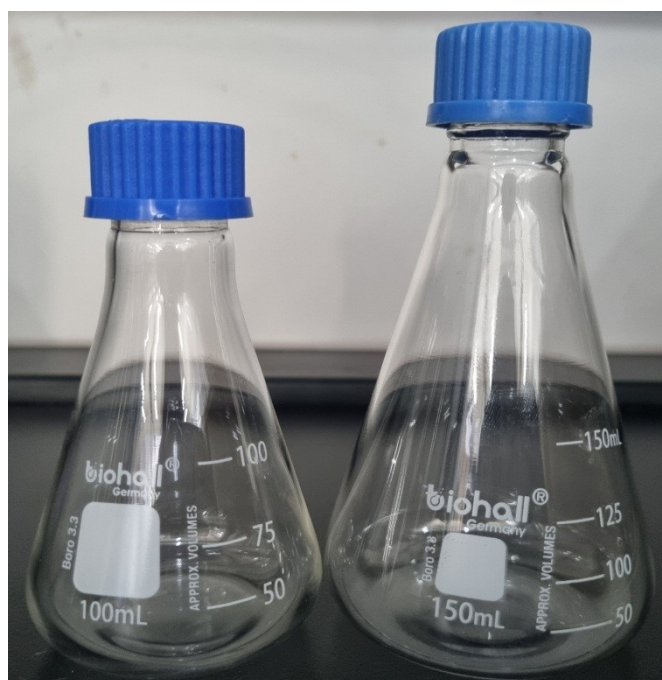

12

13

**Figure S1.** Photo of the 100-mL and 150-mL Erlenmeyer flasks

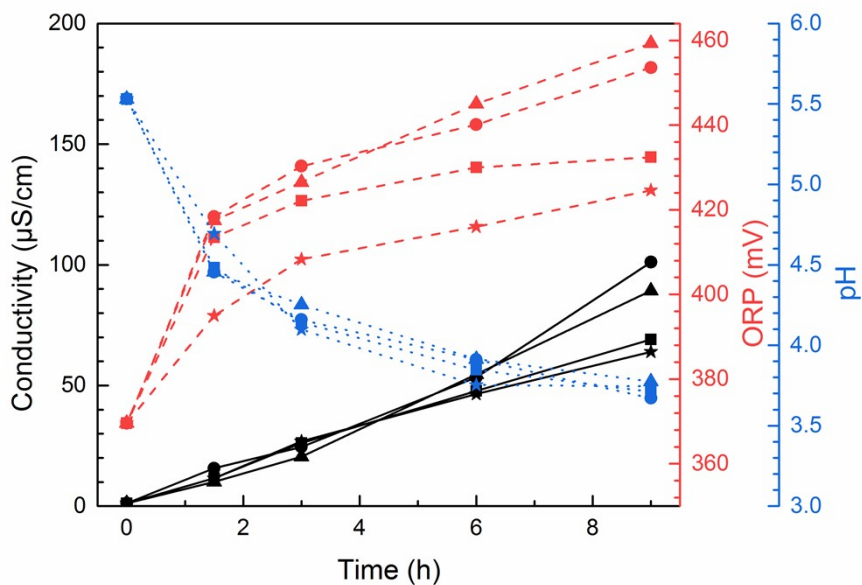

1

2 **Figure S2.** Conductivity, ORP and pH values of ultrasonic-activated water (UAW) at different  
 3 sonication time under air bubbling of 5 ml/min (square symbol), 10 ml/min (circle symbol),  
 4 20 ml/min (triangle symbol) and air purging of 20 ml/min (star symbol)

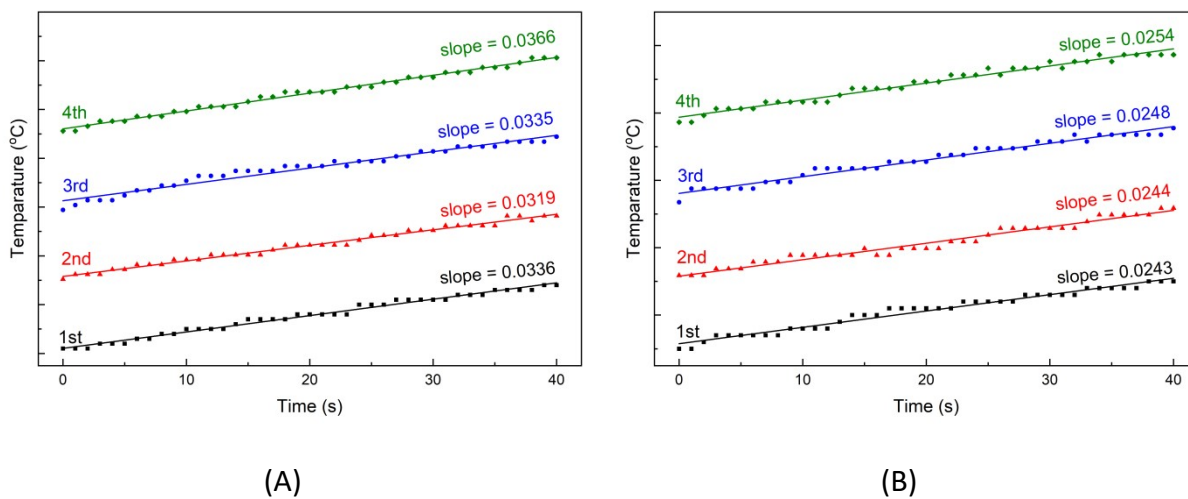

5 **Figure S3.** Time-temperature profiles obtained from calorimetric tests in the presence (A)  
 6 and absence (B) of a bubbling tube

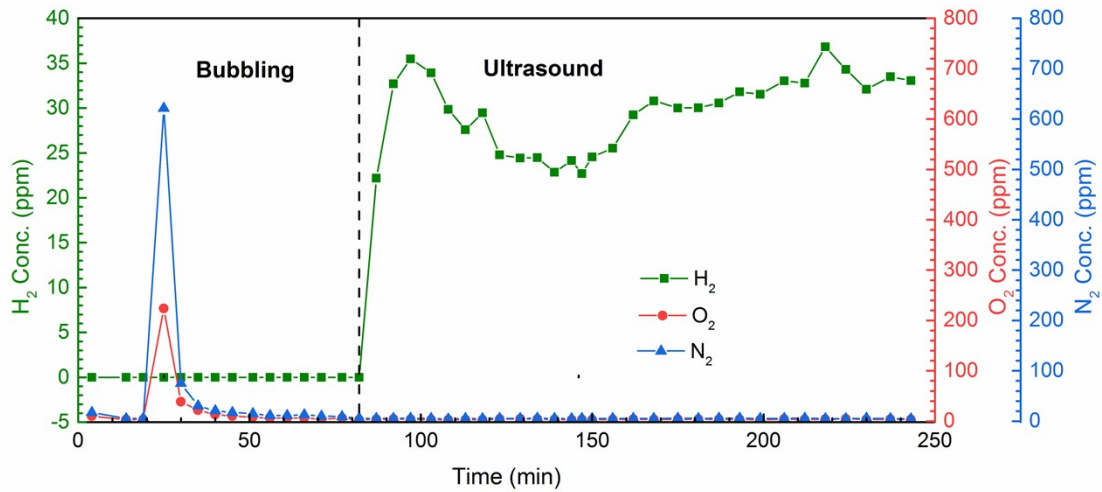

1

2

**Figure S4.** Concentration of gaseous products at bubbling and sonication stages

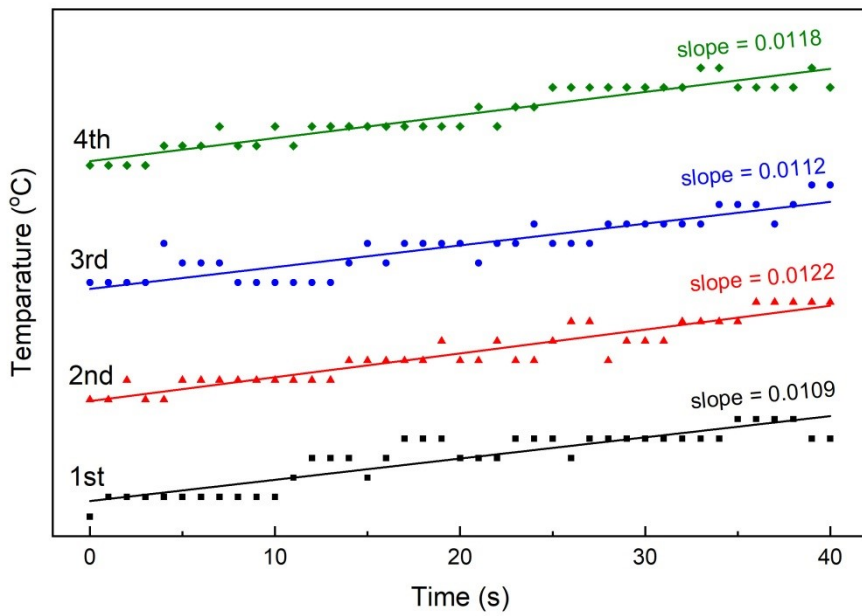

3

4

**Figure S5.** Time-temperature profiles obtained from calorimetric tests in a 150 mL-

5

Erlenmeyer flask

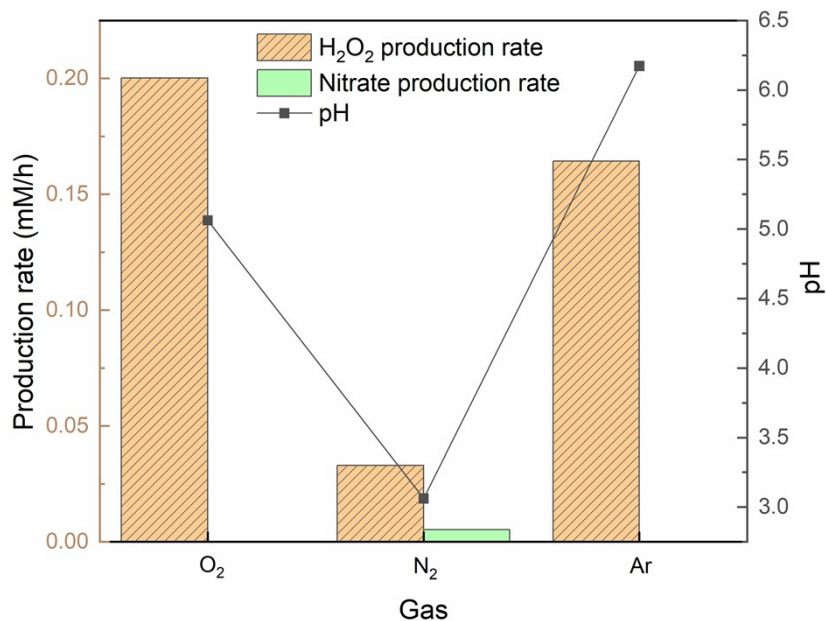

1

2 **Figure S6.** Effect of dissolved gases on the production rate of hydrogen peroxide and nitrate  
 3 and pH of UAW

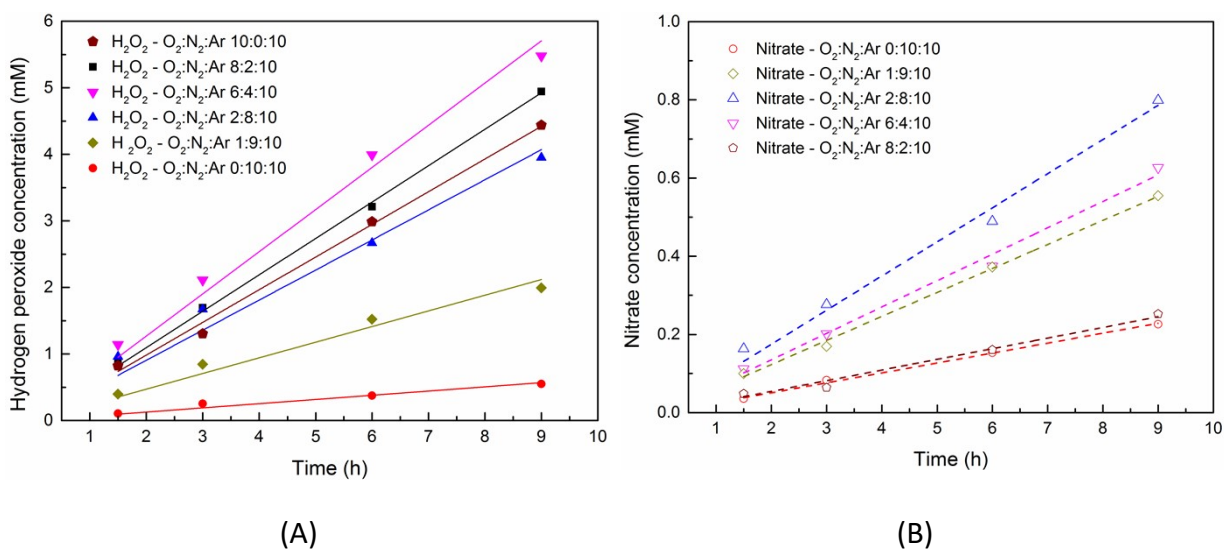

4 **Figure S7.** Concentration of (A) hydrogen peroxide and (B) nitrate with sonication time using  
 5 different O<sub>2</sub> - N<sub>2</sub> - Ar mixtures

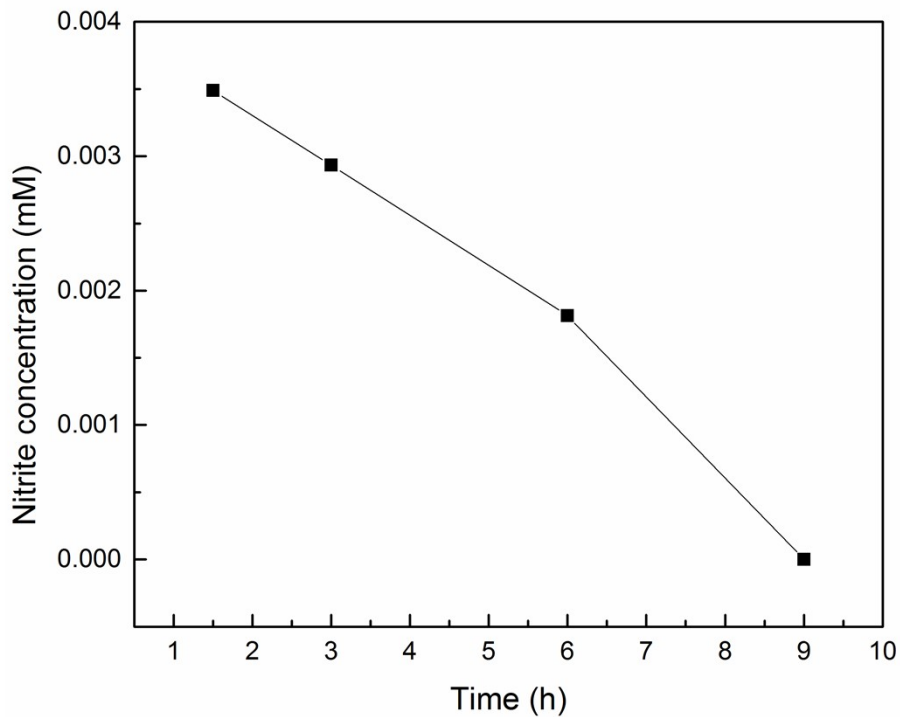

1

2 **Figure S8.** Concentration of nitrite with sonication time under N<sub>2</sub> - argon mixture (volume  
 3 ratio of O<sub>2</sub>:N<sub>2</sub>:Ar is 0:10:10)

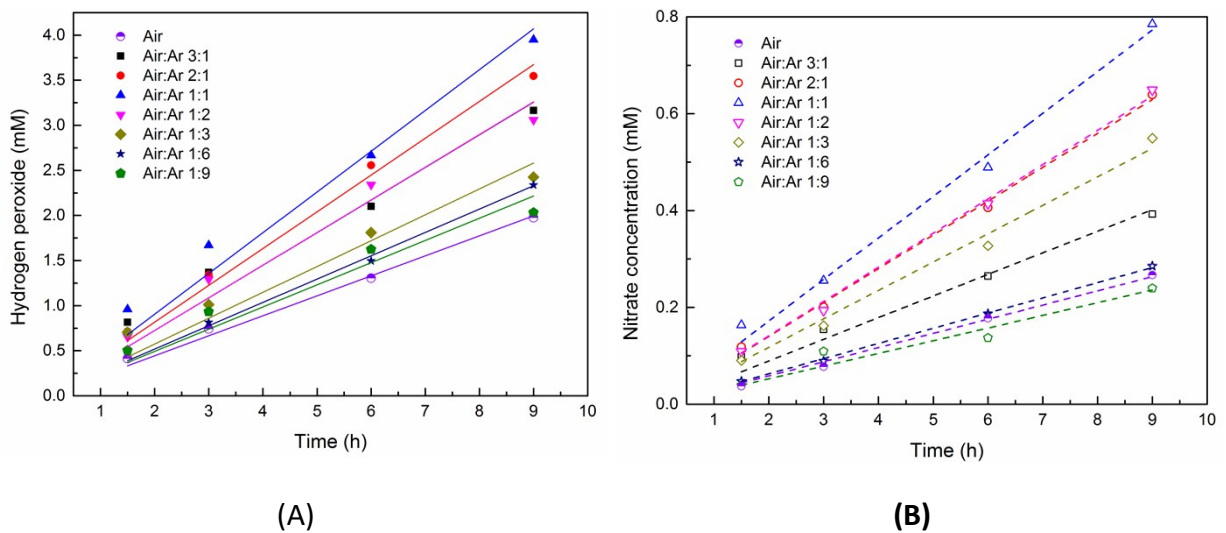

4 **Figure S9.** Concentration of (A) hydrogen peroxide and (B) nitrate with sonication time using  
 5 different air-argon mixtures

6
